# Supplementary material
Source: PubMed Central journal article supplement (PMC2840393)

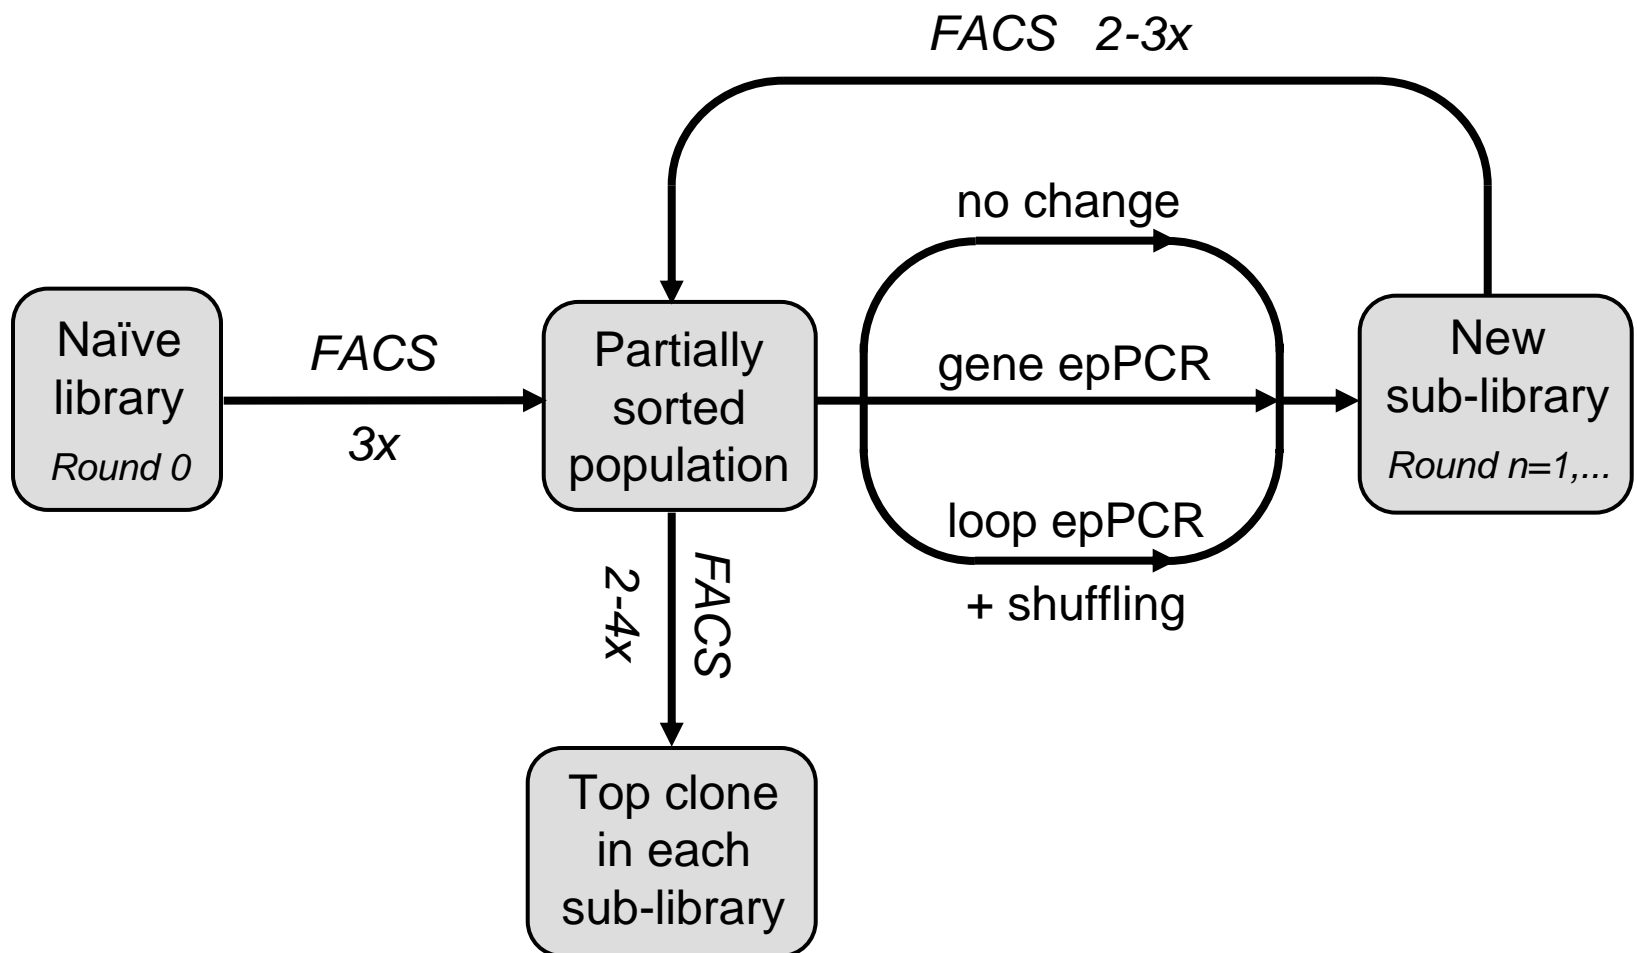

Supplement: NIHMS110753-supplement-supp_fig_1.pdf [file NIHMS110753-supplement-supp_fig_1.pdf]

(a)

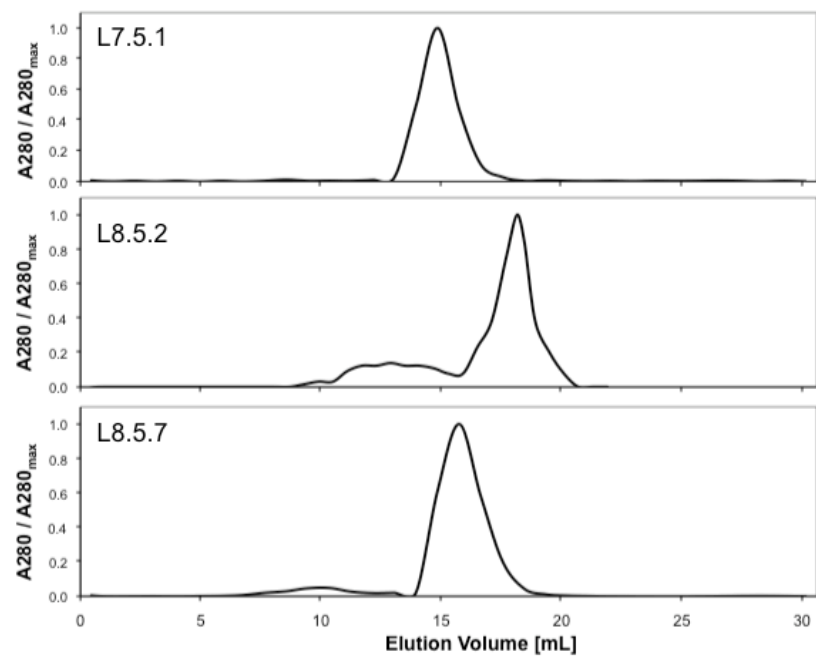

(b)

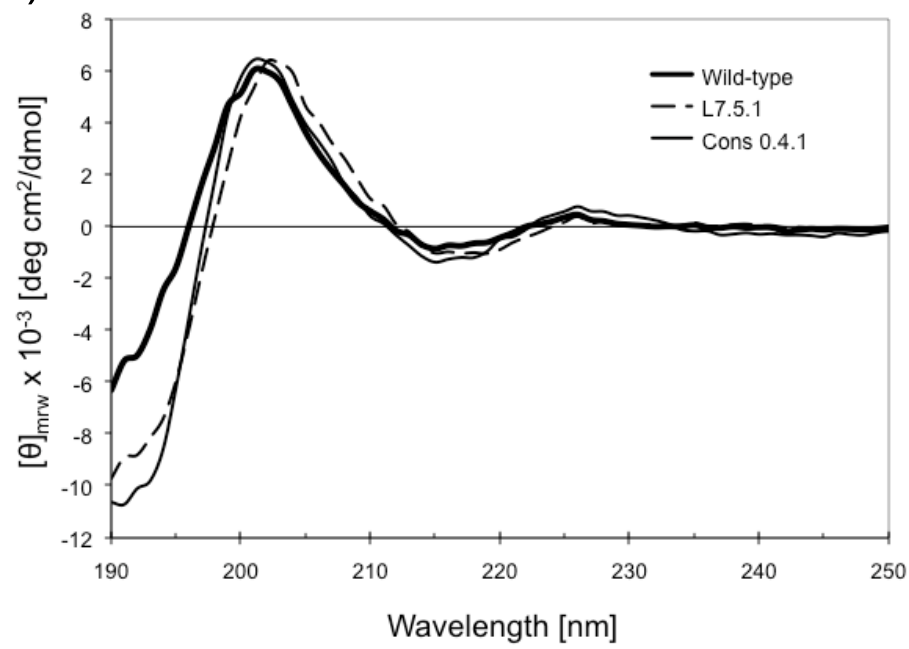

Supplement: NIHMS110753-supplement-supp_fig_2.pdf [file NIHMS110753-supplement-supp_fig_2.pdf]

(a)

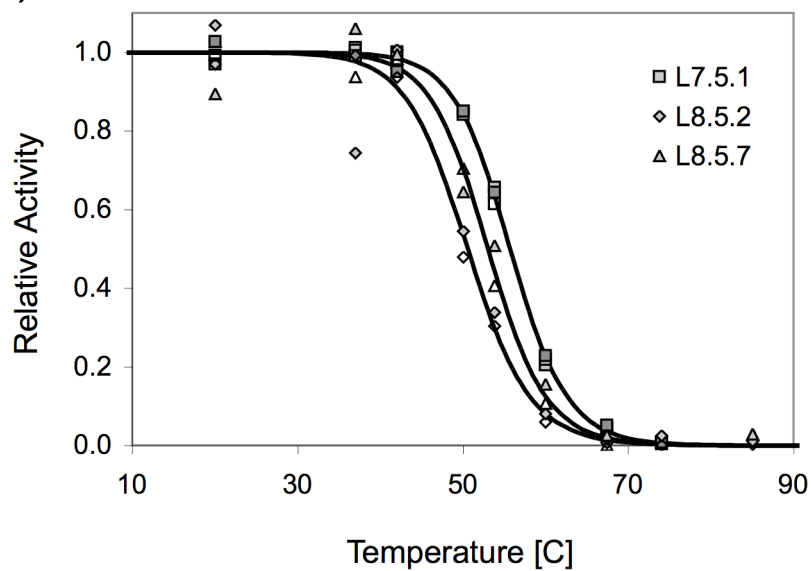

(b)

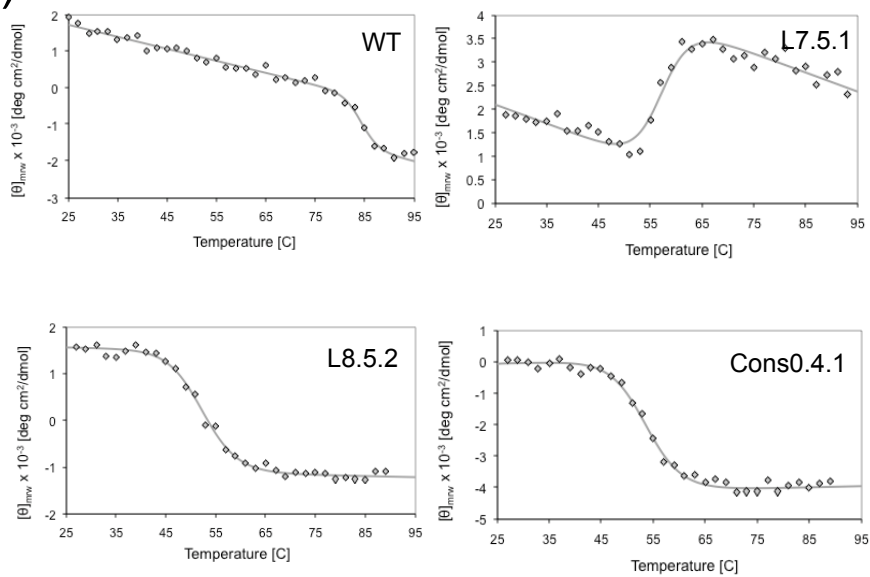

(c)

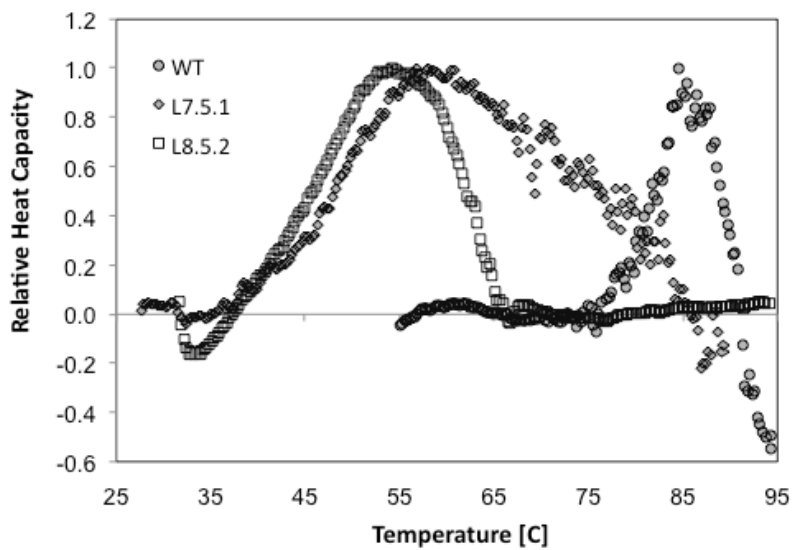

Supplement: NIHMS110753-supplement-supp_fig_3.pdf [file NIHMS110753-supplement-supp_fig_3.pdf]
